# Supplementary material
Source: MDPI journal article supplement (https://www.mdpi.com/1999-4907/14/2/432)
Supplement: s1 [file s1]

Table S1 Content of soil mineral elements in different forest types (mg/Kg)

|       | Ca           | Fe            | Na         | Mg         | Al          |
|-------|--------------|---------------|------------|------------|-------------|
| Fir   | 55.77±1.89a  | 161.59±25.23a | 0.54±0.28a | 6.48±1.29a | 27.34±7.47b |
| Pine  | 56.45±10.37a | 89.85±3.71b   | 0.07±0.04a | 8.53±2.18a | 49.52±0.43a |
| Mixed | 25.12±11.69b | 84.70±15.31b  | 4.22±3.86a | 7.20±1.20a | 5.42±1.49c  |

Values are means  $\pm$  standard error and means followed by different letter in the same column are significantly different at the 0.05 level. Fir: Pure *C.lanceolata* forest; Pine: Pure *Pinus* forest; Mixed: Mixed forest of *C.lanceolata* and *Pinus*.

Table S2 The correlation between OTUs of fungal functional guilds and soil chemical properties

|    | C:N     | TN     | SOC     | TP       | N:P     | AK     | Fe     | Ca       | Al     |
|----|---------|--------|---------|----------|---------|--------|--------|----------|--------|
| M1 | -0.70*  |        |         | -0.90*** | 0.92*** | -0.68* |        | -0.96*** | -0.67* |
| M2 | -0.75*  | 0.77*  |         | -0.74*   | 0.83**  |        | -0.73* | -0.68    |        |
| M3 |         |        |         | 0.78*    |         |        |        |          |        |
| M4 | 0.69*   | -0.70* | -0.67*  |          |         |        | 0.72*  |          |        |
| M5 |         |        |         | 0.93***  | -0.75*  |        | 0.70*  |          |        |
| M6 | 0.70*   | -0.79* | -0.81** |          |         |        | 0.88** |          |        |
| M7 | 0.91*** |        |         |          |         |        | 0.72*  |          |        |
| M8 |         |        |         | 0.77*    | -0.68*  |        | 0.75*  |          |        |
| M9 | 0.80**  | -0.75* | -0.71*  |          |         |        | 0.86** |          |        |

\*, $P<0.05$ ; \*\*, $P<0.01$ ; \*\*\*, $P<0.001$ . M1: Ectomycorrhizal; M2: Ericoid mycorrhizal; M3: Lichenized; M4: Plant pathogen; M5: Animal pathogen-fungal parasite-undefined saprotroph; M6: Ectomycorrhizal-fungal parasite-plant saprotroph-wood saprotroph; M7: Endophyte-litter Saprotroph-soil saprotroph-undefined saprotroph; M8: Arbuscular mycorrhizal; M9: Wood saprotroph; SOC: soil organic carbon; TN: total nitrogen; C:N: C:N ratio; N:P: N:P ratio; TP: total phosphorus; AK: available potassium.

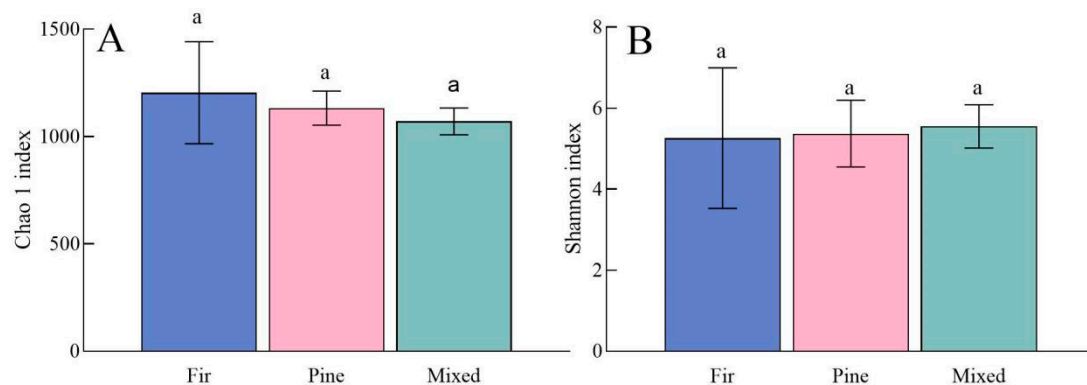

Figure.S1. A: The richness (Chao 1 index) and B: diversity (Shannon index) at the OUT level. Lowercase letters above the error bar indicate a significant difference at the 0.05 level. Fir: Pure *C.lanceolata* forest; Pine: Pure *Pinus* forest; Mixed: Mixed forest of *C.lanceolata* and *Pinus*.
